# Supplementary material for: Antibiotics Act with vB_AbaP_AGC01 Phage against Acinetobacter baumannii in Human Heat-Inactivated Plasma Blood and Galleria mellonella Models
Source: PubMed Central journal article supplement (PMC7352404; doi:10.3390/ijms21124390), 2020-06-19
Supplement: ijms-21-04390-s001.pdf [file ijms-21-04390-s001.pdf]

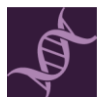

Supplementary materials to

# Antibiotics act in concert with novel Fri1-like bacteriophage vB\_AbaP\_AGC01 against multidrug resistant *Acinetobacter baumannii* in human heat inhibited plasma blood and *Galleria mellonella* models

Bartłomiej Grygorcewicz<sup>1\*</sup>, Marta Roszak<sup>1</sup>, Piotr Golec<sup>2</sup>, Daria Śleboda-Taront<sup>1</sup>, Natalia Łubowska<sup>3</sup>, Martyna Górka<sup>4</sup>, Joanna Jursa-Kulesza<sup>5</sup>, Rafał Rakoczy<sup>6</sup>, Bartosz Wojciuk<sup>7</sup>, and Barbara Dołęgowska<sup>1</sup>

<sup>1</sup> Department of Laboratory Medicine, Chair of Microbiology, Immunology and Laboratory Medicine, Pomeranian Medical University in Szczecin, Powstańców Wielkopolskich 72, 70-111 Szczecin, Poland; marta.roszak@pum.edu.pl (MR); daria.sleboda@pum.edu.pl (D.Ś-T.); barbara.dolegowska@pum.edu.pl (B.D.).

<sup>2</sup> Department of Molecular Virology, Institute of Microbiology, Faculty of Biology, University of Warsaw, Miecznikowa 1, 02-096 Warsaw, Poland; pgolec@biol.uw.edu.pl (P.G.).

<sup>3</sup> Department of Medical Microbiology, Faculty of Medicine, Medical University of Gdansk; Marii Skłodowskiej-Curie 3a, 80-210 Gdańsk, Poland; nlubowska@gumed.edu.pl

<sup>4</sup> Department of General Pathology, Pomeranian Medical University in Szczecin, Powstańców Wielkopolskich 72, 70-111 Szczecin, Poland;

<sup>6</sup> Department of Medical Microbiology, Chair of Microbiology, Immunology and Laboratory Medicine, Pomeranian Medical University in Szczecin, Powstańców Wielkopolskich 72, 70-111 Szczecin, Poland; asiaju@pum.edu.pl (J.J.-K.).

<sup>7</sup> Department of Diagnostic Immunology, Chair of Microbiology, Immunology and Laboratory Medicine, Pomeranian Medical University in Szczecin, Powstańców Wielkopolskich 72, 70-111 Szczecin, Poland; bartosz.wojciuk@pum.edu.pl (B.W.).

• Correspondence: bartlomiej.grygorcewicz@pum.edu.pl, b.grygorcewicz@gmail.com ;

**Table S1.** Host range of the vB\_AbaP\_AG01 phage. EOP – efficiency of plating; BI -Blood infection; RTI – Respiratory tract infection; STI – Skin and soft tissue infection, UTI – Urinary tract infection.

| No. | Internal code | Species                        | Source of isolation | EOP  |
|-----|---------------|--------------------------------|---------------------|------|
| 1   | G60/1         | <i>Acinetobacter baumannii</i> | BI                  | 0.79 |
| 2   | G49/1         | <i>Acinetobacter baumannii</i> | BI                  | 0    |
| 3   | G64/1         | <i>Acinetobacter baumannii</i> | BI                  | 0    |
| 4   | G61/1         | <i>Acinetobacter baumannii</i> | BI                  | 0.83 |
| 5   | G43/2         | <i>Acinetobacter baumannii</i> | BI                  | 0.97 |
| 6   | G48/2         | <i>Acinetobacter baumannii</i> | BI                  | 0.83 |
| 7   | G56/2         | <i>Acinetobacter baumannii</i> | BI                  | 1.2  |
| 8   | G38/1         | <i>Acinetobacter baumannii</i> | BI                  | 0    |
| 9   | G76/2         | <i>Acinetobacter baumannii</i> | BI                  | 0    |
| 10  | G6/2          | <i>Acinetobacter baumannii</i> | BI                  | 1.02 |
| 11  | G45/2         | <i>Acinetobacter baumannii</i> | BI                  | 1    |
| 12  | G56/1         | <i>Acinetobacter baumannii</i> | BI                  | 0.6  |
| 13  | G32/1         | <i>Acinetobacter baumannii</i> | BI                  | 0    |
| 14  | G54/2         | <i>Acinetobacter baumannii</i> | BI                  | 0    |
| 15  | G39/1         | <i>Acinetobacter baumannii</i> | BI                  | 0    |
| 16  | G63/1         | <i>Acinetobacter baumannii</i> | BI                  | 0.46 |
| 17  | G4/2          | <i>Acinetobacter baumannii</i> | BI                  | 0.92 |
| 18  | G80/1         | <i>Acinetobacter baumannii</i> | BI                  | 0    |
| 19  | G9/3          | <i>Acinetobacter baumannii</i> | BI                  | 0    |
| 20  | G5/3          | <i>Acinetobacter baumannii</i> | BI                  | 0    |
| 21  | G15/2         | <i>Acinetobacter baumannii</i> | RTI                 | 0    |
| 22  | G16/2         | <i>Acinetobacter baumannii</i> | RTI                 | 0    |
| 23  | G41/1         | <i>Acinetobacter baumannii</i> | RTI                 | 0    |
| 24  | G21/2         | <i>Acinetobacter baumannii</i> | RTI                 | 0    |
| 25  | G24/1         | <i>Acinetobacter baumannii</i> | RTI                 | 0    |
| 26  | G25/1         | <i>Acinetobacter baumannii</i> | RTI                 | 0.98 |
| 27  | G59/1         | <i>Acinetobacter baumannii</i> | RTI                 | 0.74 |
| 28  | G40/2         | <i>Acinetobacter baumannii</i> | RTI                 | 0    |
| 29  | G37/2         | <i>Acinetobacter baumannii</i> | RTI                 | 0    |
| 30  | G27/1         | <i>Acinetobacter baumannii</i> | RTI                 | 0    |
| 31  | G42/1         | <i>Acinetobacter baumannii</i> | RTI                 | 0    |
| 32  | G26/1         | <i>Acinetobacter baumannii</i> | RTI                 | 0.5  |
| 33  | G2/2          | <i>Acinetobacter baumannii</i> | RTI                 | 0    |
| 34  | G71/2         | <i>Acinetobacter baumannii</i> | RTI                 | 0.61 |
| 35  | G1/1          | <i>Acinetobacter baumannii</i> | RTI                 | 0.73 |
| 36  | G11/2         | <i>Acinetobacter baumannii</i> | RTI                 | 0    |
| 37  | G22/2         | <i>Acinetobacter baumannii</i> | RTI                 | 0    |
| 38  | G77/1         | <i>Acinetobacter baumannii</i> | RTI                 | 0    |
| 39  | G74/1         | <i>Acinetobacter baumannii</i> | RTI                 | 1.2  |
| 40  | G12/2         | <i>Acinetobacter baumannii</i> | RTI                 | 0    |
| 41  | G57/1         | <i>Acinetobacter baumannii</i> | RTI                 | 0.23 |
| 42  | G58/1         | <i>Acinetobacter baumannii</i> | RTI                 | 0.47 |
| 43  | G35/2         | <i>Acinetobacter baumannii</i> | RTI                 | 0.84 |
| 44  | G55/2         | <i>Acinetobacter baumannii</i> | RTI                 | 0.73 |
| 45  | G64/2         | <i>Acinetobacter baumannii</i> | RTI                 | 0    |

|    |       |                                |     |      |
|----|-------|--------------------------------|-----|------|
| 46 | G10/2 | <i>Acinetobacter baumannii</i> | RTI | 0.54 |
| 47 | G54/1 | <i>Acinetobacter baumannii</i> | RTI | 1.41 |
| 48 | G36/2 | <i>Acinetobacter baumannii</i> | RTI | 1    |
| 49 | G60/2 | <i>Acinetobacter baumannii</i> | RTI | 1.12 |
| 50 | G59/2 | <i>Acinetobacter baumannii</i> | RTI | 0.92 |
| 51 | G34/2 | <i>Acinetobacter baumannii</i> | RTI | 0    |
| 52 | G70/2 | <i>Acinetobacter baumannii</i> | RTI | 0    |
| 53 | G4/1  | <i>Acinetobacter baumannii</i> | RTI | 0    |
| 54 | G23/2 | <i>Acinetobacter baumannii</i> | RTI | 0.96 |
| 55 | G20/1 | <i>Acinetobacter baumannii</i> | RTI | 0.57 |
| 56 | G20/2 | <i>Acinetobacter baumannii</i> | RTI | 0.29 |
| 57 | G62/2 | <i>Acinetobacter baumannii</i> | RTI | 0.66 |
| 58 | G32/2 | <i>Acinetobacter baumannii</i> | RTI | 0.39 |
| 59 | G1/2  | <i>Acinetobacter baumannii</i> | RTI | 0    |
| 60 | G63/2 | <i>Acinetobacter baumannii</i> | RTI | 0    |
| 61 | G3/1  | <i>Acinetobacter baumannii</i> | RTI | 0    |
| 62 | G36/1 | <i>Acinetobacter baumannii</i> | RTI | 0.78 |
| 63 | G58/2 | <i>Acinetobacter baumannii</i> | RTI | 0    |
| 64 | G9/1  | <i>Acinetobacter baumannii</i> | RTI | 0    |
| 65 | G75/2 | <i>Acinetobacter baumannii</i> | RTI | 0    |
| 66 | G5/2  | <i>Acinetobacter baumannii</i> | RTI | 0    |
| 67 | G29/1 | <i>Acinetobacter baumannii</i> | RTI | 0    |
| 68 | G78/2 | <i>Acinetobacter baumannii</i> | RTI | 0.49 |
| 69 | G3/2  | <i>Acinetobacter baumannii</i> | RTI | 0.84 |
| 70 | G74/2 | <i>Acinetobacter baumannii</i> | RTI | 0.76 |
| 71 | G31/2 | <i>Acinetobacter baumannii</i> | RTI | 0    |
| 72 | G46/2 | <i>Acinetobacter baumannii</i> | RTI | 0    |
| 73 | G44/2 | <i>Acinetobacter baumannii</i> | RTI | 0    |
| 74 | G51/2 | <i>Acinetobacter baumannii</i> | RTI | 0    |
| 75 | G33/2 | <i>Acinetobacter baumannii</i> | RTI | 1.12 |
| 76 | G2/1  | <i>Acinetobacter baumannii</i> | RTI | 0    |
| 77 | G30/1 | <i>Acinetobacter baumannii</i> | RTI | 0    |
| 78 | G73/2 | <i>Acinetobacter baumannii</i> | RTI | 0    |
| 79 | G31/1 | <i>Acinetobacter baumannii</i> | RTI | 0    |
| 80 | G5/1  | <i>Acinetobacter baumannii</i> | RTI | 0    |
| 81 | G57/2 | <i>Acinetobacter baumannii</i> | RTI | 0.82 |
| 82 | G62/1 | <i>Acinetobacter baumannii</i> | RTI | 0.46 |
| 83 | G25/2 | <i>Acinetobacter baumannii</i> | RTI | 0    |
| 84 | G61/2 | <i>Acinetobacter baumannii</i> | RTI | 0    |
| 85 | G19/2 | <i>Acinetobacter baumannii</i> | RTI | 0    |
| 86 | G16/1 | <i>Acinetobacter baumannii</i> | RTI | 0    |
| 87 | G55/1 | <i>Acinetobacter baumannii</i> | RTI | 0.56 |
| 88 | G79/1 | <i>Acinetobacter baumannii</i> | RTI | 0    |
| 89 | G35/1 | <i>Acinetobacter baumannii</i> | RTI | 0.17 |
| 90 | G17/1 | <i>Acinetobacter baumannii</i> | RTI | 0.93 |
| 91 | G30/2 | <i>Acinetobacter baumannii</i> | RTI | 0    |
| 92 | G50/1 | <i>Acinetobacter baumannii</i> | RTI | 0    |
| 93 | G6/1  | <i>Acinetobacter baumannii</i> | RTI | 0.9  |
| 94 | G81/1 | <i>Acinetobacter baumannii</i> | RTI | 0.83 |
| 95 | G9/2  | <i>Acinetobacter baumannii</i> | RTI | 0.58 |

|     |        |                                |     |      |
|-----|--------|--------------------------------|-----|------|
| 96  | G7/3   | <i>Acinetobacter baumannii</i> | RTI | 0    |
| 97  | G11/3  | <i>Acinetobacter baumannii</i> | RTI | 0    |
| 98  | G93/01 | <i>Acinetobacter baumannii</i> | RTI | 0.93 |
| 99  | G14/2  | <i>Acinetobacter baumannii</i> | STI | 0.34 |
| 100 | G48/1  | <i>Acinetobacter baumannii</i> | STI | 0.29 |
| 101 | G34/1  | <i>Acinetobacter baumannii</i> | STI | 0    |
| 102 | G72/1  | <i>Acinetobacter baumannii</i> | STI | 0.92 |
| 103 | G77/2  | <i>Acinetobacter baumannii</i> | STI | 0    |
| 104 | G23/1  | <i>Acinetobacter baumannii</i> | STI | 0    |
| 105 | G14/1  | <i>Acinetobacter baumannii</i> | STI | 0    |
| 106 | G76/1  | <i>Acinetobacter baumannii</i> | STI | 0.62 |
| 107 | G80/2  | <i>Acinetobacter baumannii</i> | STI | 0.21 |
| 108 | G47/2  | <i>Acinetobacter baumannii</i> | STI | 0.81 |
| 109 | G53/2  | <i>Acinetobacter baumannii</i> | STI | 0    |
| 110 | G42/2  | <i>Acinetobacter baumannii</i> | STI | 1.13 |
| 111 | G45/1  | <i>Acinetobacter baumannii</i> | STI | 1    |
| 112 | G28/2  | <i>Acinetobacter baumannii</i> | STI | 0.67 |
| 113 | G51/1  | <i>Acinetobacter baumannii</i> | STI | 0    |
| 114 | G44/1  | <i>Acinetobacter baumannii</i> | STI | 0    |
| 115 | G29/2  | <i>Acinetobacter baumannii</i> | STI | 0    |
| 116 | G53/1  | <i>Acinetobacter baumannii</i> | STI | 0.64 |
| 117 | G43/1  | <i>Acinetobacter baumannii</i> | STI | 0    |
| 118 | G12/1  | <i>Acinetobacter baumannii</i> | STI | 0.76 |
| 119 | G24/2  | <i>Acinetobacter baumannii</i> | STI | 0.39 |
| 120 | G41/2  | <i>Acinetobacter baumannii</i> | STI | 0    |
| 121 | G10/1  | <i>Acinetobacter baumannii</i> | STI | 0.59 |
| 122 | G37/1  | <i>Acinetobacter baumannii</i> | STI | 0.34 |
| 123 | G22/1  | <i>Acinetobacter baumannii</i> | STI | 0.22 |
| 124 | G33/1  | <i>Acinetobacter baumannii</i> | STI | 0    |
| 125 | G8/1   | <i>Acinetobacter baumannii</i> | STI | 1.34 |
| 126 | G18/1  | <i>Acinetobacter baumannii</i> | STI | 0    |
| 127 | G11/1  | <i>Acinetobacter baumannii</i> | STI | 0    |
| 128 | G13/2  | <i>Acinetobacter baumannii</i> | UTI | 1    |
| 129 | G67/2  | <i>Acinetobacter baumannii</i> | UTI | 0.59 |
| 130 | G47/1  | <i>Acinetobacter baumannii</i> | UTI | 0.92 |
| 131 | G65/1  | <i>Acinetobacter baumannii</i> | UTI | 0.64 |
| 132 | G18/2  | <i>Acinetobacter baumannii</i> | UTI | 0    |
| 133 | G75/1  | <i>Acinetobacter baumannii</i> | UTI | 0.53 |
| 134 | G46/1  | <i>Acinetobacter baumannii</i> | UTI | 0    |
| 135 | G17/2  | <i>Acinetobacter baumannii</i> | UTI | 0.48 |
| 136 | G13/1  | <i>Acinetobacter baumannii</i> | UTI | 0    |
| 137 | G15/1  | <i>Acinetobacter baumannii</i> | UTI | 0.85 |
| 138 | G78/1  | <i>Acinetobacter baumannii</i> | UTI | 0    |
| 139 | G73/1  | <i>Acinetobacter baumannii</i> | UTI | 0.79 |
| 140 | G65/2  | <i>Acinetobacter baumannii</i> | UTI | 0.93 |
| 141 | G38/2  | <i>Acinetobacter baumannii</i> | UTI | 1.2  |
| 142 | G79/2  | <i>Acinetobacter baumannii</i> | UTI | 0.21 |
| 143 | G71/1  | <i>Acinetobacter baumannii</i> | UTI | 0    |
| 144 | G7/2   | <i>Acinetobacter baumannii</i> | UTI | 0    |
| 145 | G70/1  | <i>Acinetobacter baumannii</i> | UTI | 0    |

|     |             |                                |     |      |
|-----|-------------|--------------------------------|-----|------|
| 146 | G66/2       | <i>Acinetobacter baumannii</i> | UTI | 0.89 |
| 147 | G7/1        | <i>Acinetobacter baumannii</i> | UTI | 0.71 |
| 148 | G68/1       | <i>Acinetobacter baumannii</i> | UTI | 1.32 |
| 149 | G66/1       | <i>Acinetobacter baumannii</i> | UTI | 0    |
| 150 | G50/2       | <i>Acinetobacter baumannii</i> | UTI | 0.49 |
| 151 | G52/1       | <i>Acinetobacter baumannii</i> | UTI | 0    |
| 152 | G8/2        | <i>Acinetobacter baumannii</i> | UTI | 0    |
| 153 | G49/2       | <i>Acinetobacter baumannii</i> | UTI | 0.83 |
| 154 | G68/2       | <i>Acinetobacter baumannii</i> | UTI | 0.24 |
| 155 | G69/2       | <i>Acinetobacter baumannii</i> | UTI | 00   |
| 156 | G40/1       | <i>Acinetobacter baumannii</i> | UTI | 0    |
| 157 | G72/2       | <i>Acinetobacter baumannii</i> | UTI | 0    |
| 158 | G27/2       | <i>Acinetobacter baumannii</i> | UTI | 0.9  |
| 159 | G19/1       | <i>Acinetobacter baumannii</i> | UTI | 0.34 |
| 160 | G69/1       | <i>Acinetobacter baumannii</i> | UTI | 0    |
| 161 | G21/1       | <i>Acinetobacter baumannii</i> | UTI | 0    |
| 162 | G52/2       | <i>Acinetobacter baumannii</i> | UTI | 0    |
| 163 | Ab1/113     | <i>Acinetobacter baumannii</i> | UTI | 1.2  |
| 164 | Ab1/119     | <i>Acinetobacter baumannii</i> | UTI | 1.1  |
| 165 | Ab1/123     | <i>Acinetobacter baumannii</i> | UTI | 0.46 |
| 166 | Ab2/01      | <i>Acinetobacter baumannii</i> | UTI | 0.32 |
| 167 | Ab2/02      | <i>Acinetobacter baumannii</i> | UTI | 0    |
| 168 | Ab2/19      | <i>Acinetobacter baumannii</i> | UTI | 0.93 |
| 169 | Ab2/87      | <i>Acinetobacter baumannii</i> | UTI | 0    |
| 170 | Ab3/1       | <i>Acinetobacter baumannii</i> | UTI | 0    |
| 171 | Ab4/12      | <i>Acinetobacter baumannii</i> | UTI | 0    |
| 172 | Ab5/02      | <i>Acinetobacter baumannii</i> | UTI | 0    |
| 173 | Ab5/16      | <i>Acinetobacter baumannii</i> | UTI | 0.12 |
| 174 | Ab5/19      | <i>Acinetobacter baumannii</i> | UTI | 1.32 |
| 175 | Ab5/23      | <i>Acinetobacter baumannii</i> | UTI | 0    |
| 176 | Ab5/19      | <i>Acinetobacter baumannii</i> | UTI | 0.39 |
| 177 | Ab5/22      | <i>Acinetobacter baumannii</i> | UTI | 0.66 |
| 178 | Ab6/11      | <i>Acinetobacter baumannii</i> | UTI | 0    |
| 179 | Ab6/12      | <i>Acinetobacter baumannii</i> | UTI | 0    |
| 180 | Ab6/13      | <i>Acinetobacter baumannii</i> | UTI | 0.79 |
| 181 | Ab6/14      | <i>Acinetobacter baumannii</i> | UTI | 0.39 |
| 182 | Ab6/15      | <i>Acinetobacter baumannii</i> | UTI | 0.63 |
| 183 | Ab6/16      | <i>Acinetobacter baumannii</i> | UTI | 0    |
| 184 | ATCC®19606™ | <i>Acinetobacter baumannii</i> | UTI | 1    |
| 185 | ATCC®17978™ | <i>Acinetobacter baumannii</i> | UTI | 0.43 |

**Table S2.** Predicted function of the open reading frames defined within the functional module.

| <b>Functional module</b>     | <b>Predicted function (ORF)</b>              |
|------------------------------|----------------------------------------------|
| DNA replication              | DNA binding protein (ORFs: 14, 16, 22, 51)   |
|                              | DNA primase/helicase (ORFs: 17, 19)          |
|                              | DNA/RNA binding protein (ORF20)              |
|                              | DNA helicase (ORF21)                         |
|                              | ATP-dependent DNA ligase (ORF23)             |
|                              | DNA polymerase I (ORF24),                    |
|                              | deoxynucleoside monophosphate kinase (ORF27) |
|                              | 5'-3' exonuclease (ORF28)                    |
|                              | tRNA nucleotidyltransferase (ORF29)          |
|                              | DNA endonuclease VII (ORF30)                 |
|                              | phosphoesterase with HTH domain (ORF31)      |
| dNMP kinase (ORF32)          |                                              |
| RNA polymerase (RNAP)        | DNA-directed RNA polymerase (ORF33)          |
| Virus structure and assembly | head-to-tail connector protein (ORF36)       |
|                              | scaffolding protein (ORF37)                  |
|                              | major capsid protein (ORF38)                 |
|                              | tail tubular protein A (ORF39)               |
|                              | tail needle protein (ORF40)                  |
|                              | tail tubular protein B (ORF41)               |
|                              | tail tubular protein C (ORF42)               |
|                              | internal virion protein A (ORF43)            |
|                              | internal virion protein A (ORF44)            |
|                              | DNA ejectosome component (ORF45)             |
|                              | tail fiber protein (ORF46)                   |
| DNA maturase A (ORF49)       |                                              |
| DNA maturase B (ORF50)       |                                              |
| Host cell lysis              | holin (ORF47)                                |
|                              | endolysin (ORF48)                            |

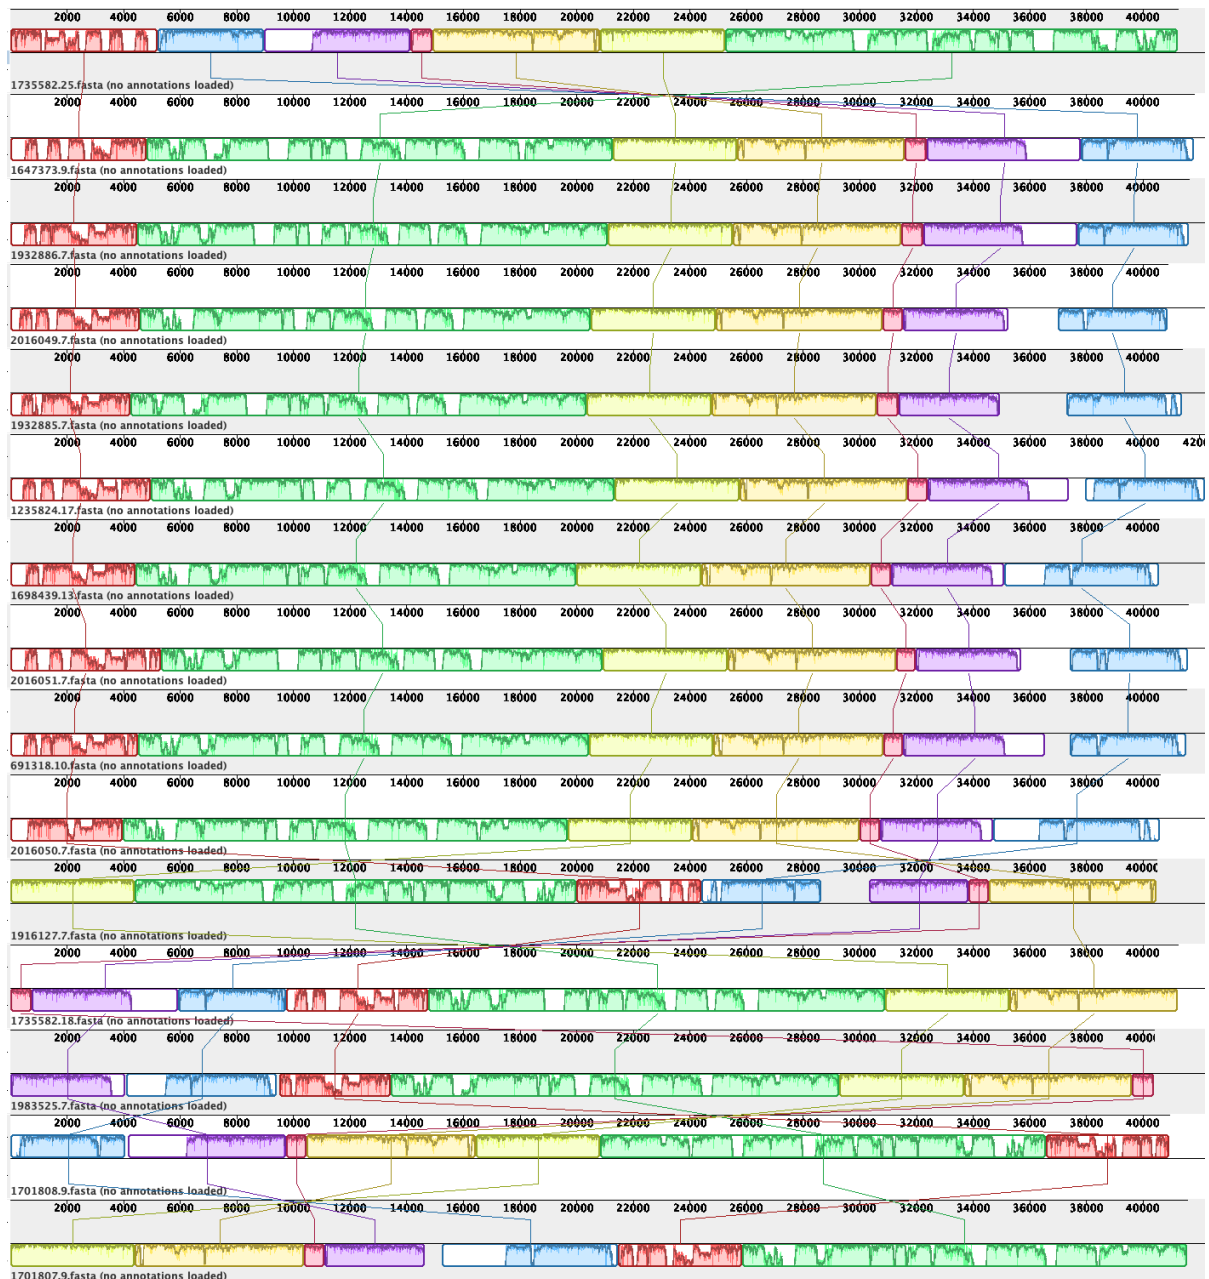

**Figure S1.** Mauve Colored boxes indicate homologous DNA regions between genomes without genomic rearrangements. Genomic similarity is represented by the height of the bars, which corresponds to the average level of conservation in that region of the genome sequence. Completely white regions represent fragments that were not aligned or contained sequence elements specific to a particular genome. Data were analyzed with PATRIC 3.6.3. [1] (1735582.25 – *Acinetobacter* phage vB\_AbaP\_AGC01; 1235824.17 - *Acinetobacter* phage Abp1; 1647373.9 - *Acinetobacter* phage Fri1; 1698439.13 - *Acinetobacter* phage phiAB6; 1701807.9 - *Acinetobacter* phage vB\_AbaP\_PD-6A3; 1701808.9 - *Acinetobacter* phage vB\_AbaP\_PD-AB9; 1735582.18 - *Acinetobacter* phage vB\_AbaP\_IME200; 1916127.7 - *Acinetobacter* phage SH-Ab 15519; 1932885.7 - *Acinetobacter* phage vB\_AbaP\_AS12; 1932886.7 - *Acinetobacter* phage vB\_AbaP\_AS11; 1983525.7 - *Acinetobacter* phage WCHABP5; 2016049.7 - *Acinetobacter* phage vB\_AbaP\_B1; 2016050.7 - *Acinetobacter* phage vB\_AbaP\_B3; 2016051.7 - *Acinetobacter* phage vB\_AbaP\_B5; 691318.10 - *Acinetobacter* phage phiAB1).

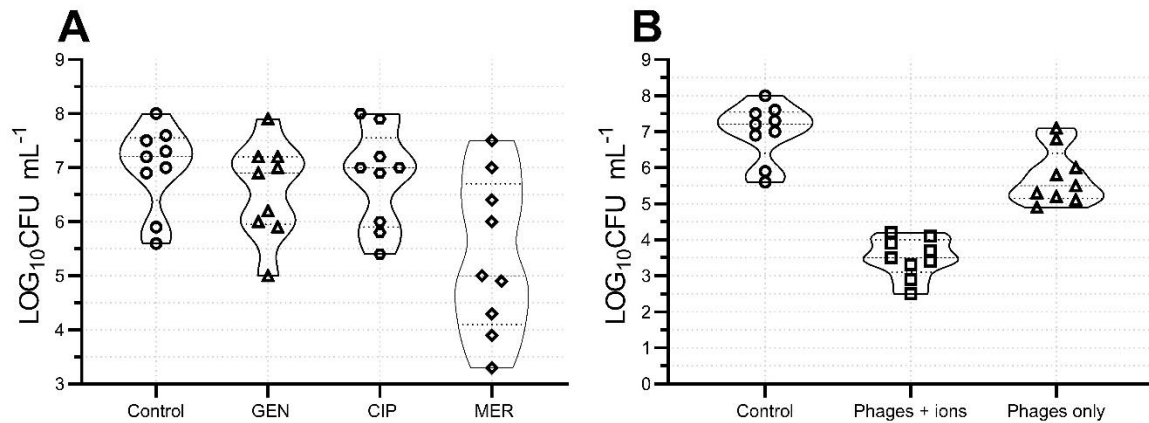

Figure S2. Antibiotic and Phage activity in the human heat inhibited plasma blood model. (A) Effectiveness of the *A. baumannii* treatment with antibiotics in the human heat inhibited plasma blood model. Control – without antibiotic addition; GEN - gentamicin, CIP – ciprofloxacin, MER – meropenem. (B) Influence of the ions reconstruction ( $\text{CaCl}_2$ ,  $\text{FeSO}_4$ , or  $\text{MgCl}_2$  ions were reconstructed at a final concentration of 5 mM) on the bacteriophage activity in the human heat inhibited plasma blood model

1. Wattam AR, Davis JJ, Assaf R, Boisvert S, Brettin T, Bun C, Conrad N, Dietrich EM, Disz T, Gabbard JL, Gerdes S, Henry CS, Kenyon RW, Machi D, Mao C, Nordberg EK, Olsen GJ, Murphy-Olson DE, Olson R, Overbeek R, Parrello B, Pusch GD, Shukla M, Vonstein V, Warren A, Xia F, Yoo H, Stevens RL. Improvements to PATRIC, the all-bacterial Bioinformatics Database and Analysis Resource Center. *Nucleic Acids Res.* 2017 Jan 4;45(D1):D535-D542. doi: 10.1093/nar/gkw1017. PMID: 27899627. PMCID: PMC5210524.
